# Supplementary material for: Combining Citizen Science and Genomics to Investigate Tick, Pathogen, and Commensal Microbiome at Single-Tick Resolution
Source: PubMed Central journal article supplement (PMC6985576; doi:10.3389/fgene.2019.01322), 2020-01-21

**Figure S2. Beta diversity measured by occurrence.** Beta diversity did not differ significantly between *B. burgdorferi*-infected (blue) and uninfected (red) ticks when measured by occurrence (unweighted UniFrac distance, pseudo-F test=1.197,  $p=0.161$ ).

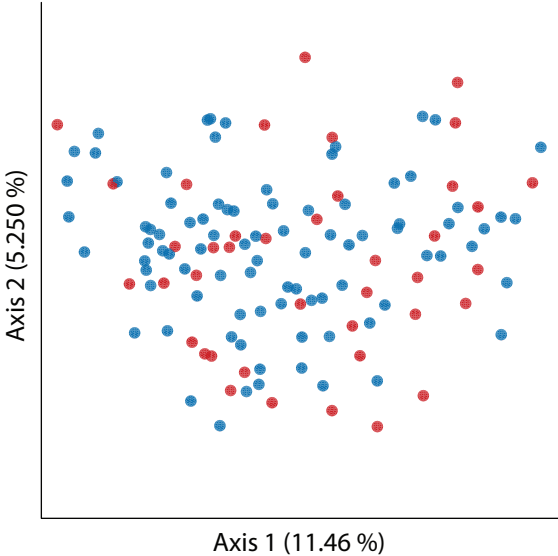

Supplement: Image_2.pdf [file Image_2.pdf]
